# Supplementary material for: A Cd-MOF as a fluorescent probe for highly selective, sensitive and stable detection of antibiotics in water
Source: Royal Society of Chemistry journal article supplement (doi:10.1039/c8an02442a), 2019-01-01
Supplement: c8an02442a1.pdf [file c8an02442a1.pdf]

## Supplementary Information

### Section 1. General Characterizations

#### Crystal data of Cd-MOF

Table S1 Selective Bond lengths [ $\text{\AA}$ ] and angles [ $^\circ$ ] for Cd-MOF.

|                   |            |                     |            |
|-------------------|------------|---------------------|------------|
| Cd(1)-N(1)        | 2.2367(15) | Cd(1)-O(2)          | 2.2393(13) |
| Cd(1)-N(3)        | 2.3095(16) | Cd(1)-O(4)#1        | 2.3465(15) |
| Cd(1)-O(3)#1      | 2.4139(15) | Cd(1)-O(1)          | 2.5968(14) |
| N(1)-Cd(1)-O(2)   | 129.90(6)  | N(1)-Cd(1)-N(3)     | 94.22(6)   |
| O(2)-Cd(1)-N(3)   | 98.99(5)   | N(1)-Cd(1)-O(4)#1   | 128.75(6)  |
| O(2)-Cd(1)-O(4)#1 | 100.50(5)  | N(3)-Cd(1)-O(4)#1   | 85.22(5)   |
| N(1)-Cd(1)-O(3)#1 | 100.95(6)  | O(2)-Cd(1)-O(3)#1   | 100.94(6)  |
| N(3)-Cd(1)-O(3)#1 | 137.53(5)  | O(4)#1-Cd(1)-O(3)#1 | 54.48(5)   |
| N(1)-Cd(1)-O(1)   | 82.76(5)   | O(2)-Cd(1)-O(1)     | 53.19(5)   |
| N(3)-Cd(1)-O(1)   | 132.30(6)  | O(4)#1-Cd(1)-O(1)   | 132.59(5)  |
| O(3)#1-Cd(1)-O(1) | 89.16(5)   |                     |            |

Symmetry code: #1 x+1, y, z

## Section 2. Comparison

**Table S2.**

| Journal                            | MOFs              | $K_{sv}$ ( $M^{-1}$ ) | Antibiotic type | LOD          | Reference |
|------------------------------------|-------------------|-----------------------|-----------------|--------------|-----------|
| <i>J Am Chem Soc</i>               | Zr(IV)-based MOFs | $1.1 \times 10^5$     | 12              | 58 ppb       | [1]       |
| <i>J. Mater. Chem. A</i>           | Cd(II)-based MOFs | $1.33 \times 10^5$    | 9               | 60 ppb       | [2]       |
| <i>Anal Chem</i>                   | In-MOFs           | ---                   | 10              | 0.2 ppm      | [3]       |
| <i>Crystal growth &amp; Design</i> | Zn/Cd-MOFs        | $4.063 \times 10^4$   | 11              | 0.90 $\mu$ M | [4]       |

## Section 3. FT-IR spectrum of Cd-MOF

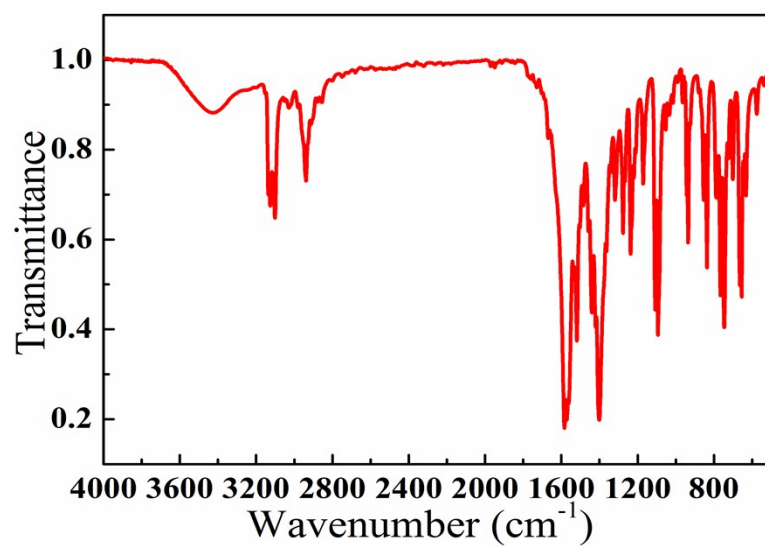

**Fig. S1:** FT-IR spectrum of Cd-MOF

## Section 4. PXRD patterns

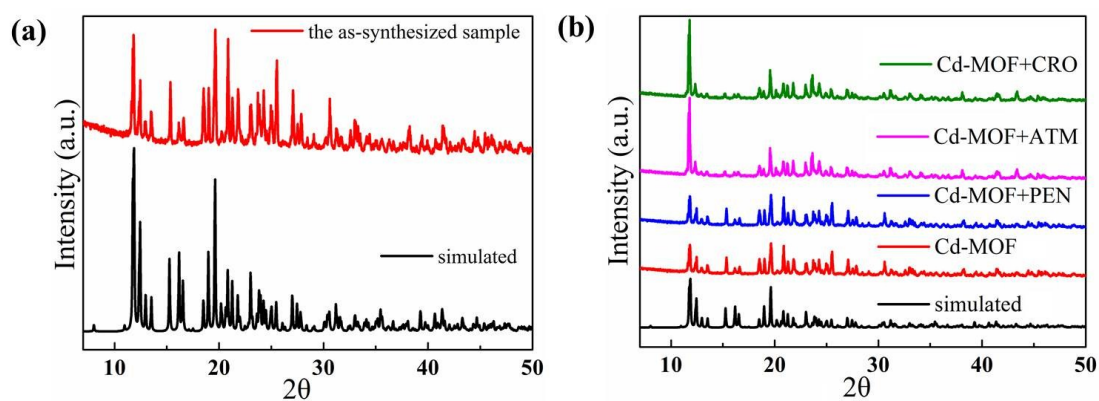

**Fig. S2:** (a) The PXRD pattern of the as-synthesized sample(Cd-MOF); (b) The PXRD pattern of Cd-MOF immersed in antibiotic solution(14  $\mu$ M).

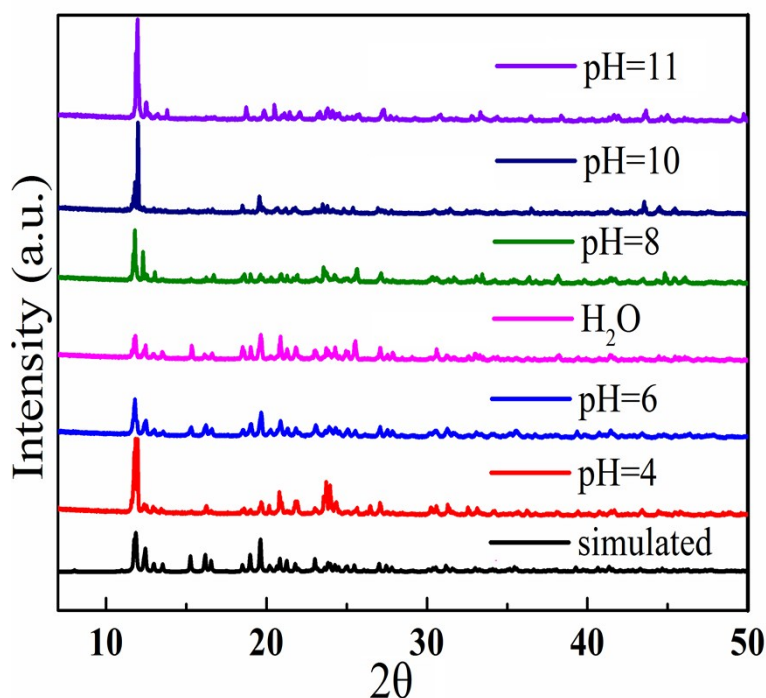

**Fig. S3:** The PXRD pattern of Cd-MOF immersed in pH= 4, 6, 8, 10, 11 aqueous solutions and H<sub>2</sub>O for 24 h.

**Section 5.** The fluorescence spectra of solid samples

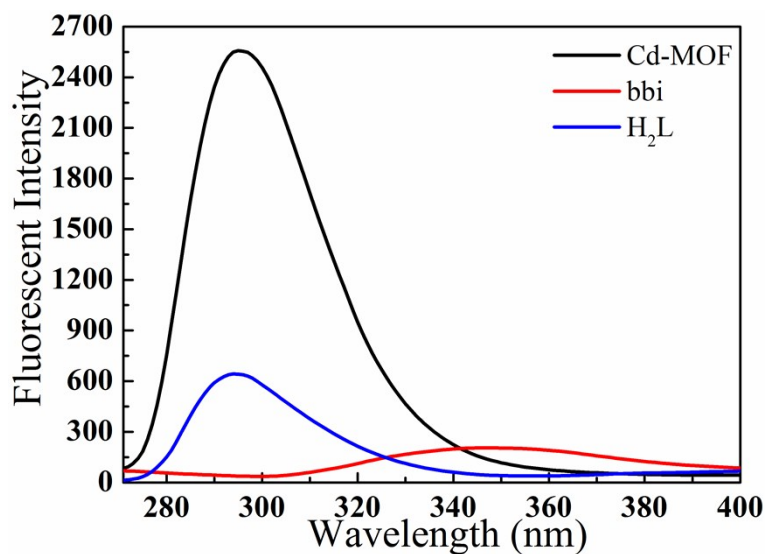

**Fig. S4:** The fluorescence spectra of solid samples of Cd-MOF, bbi and H<sub>2</sub>L ligands.

## Section 6. The structural figure of antibiotics

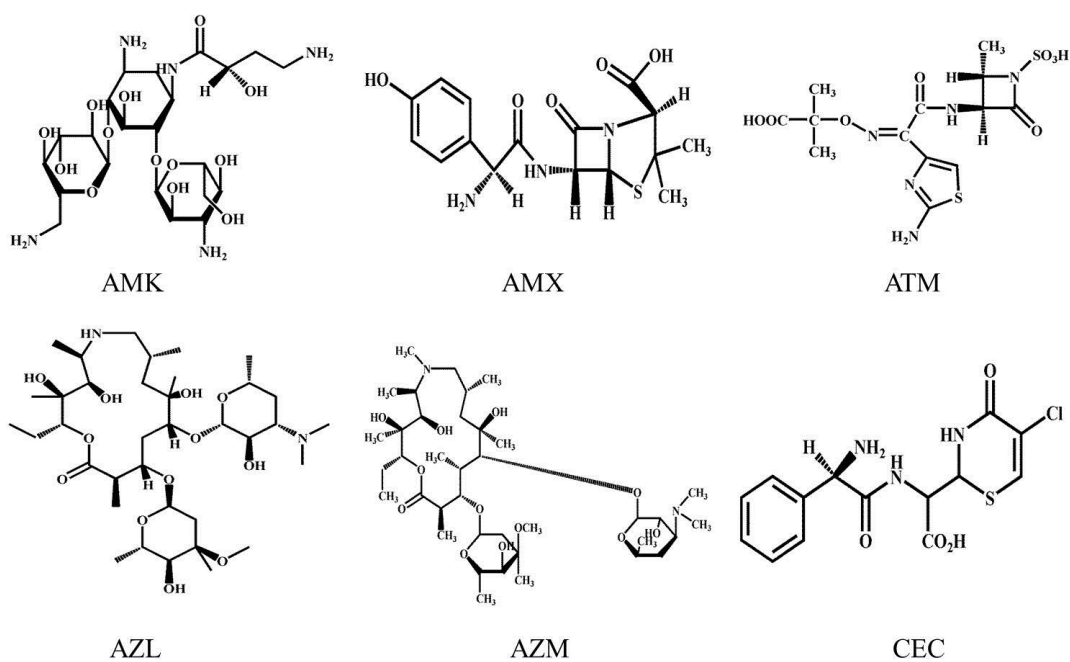

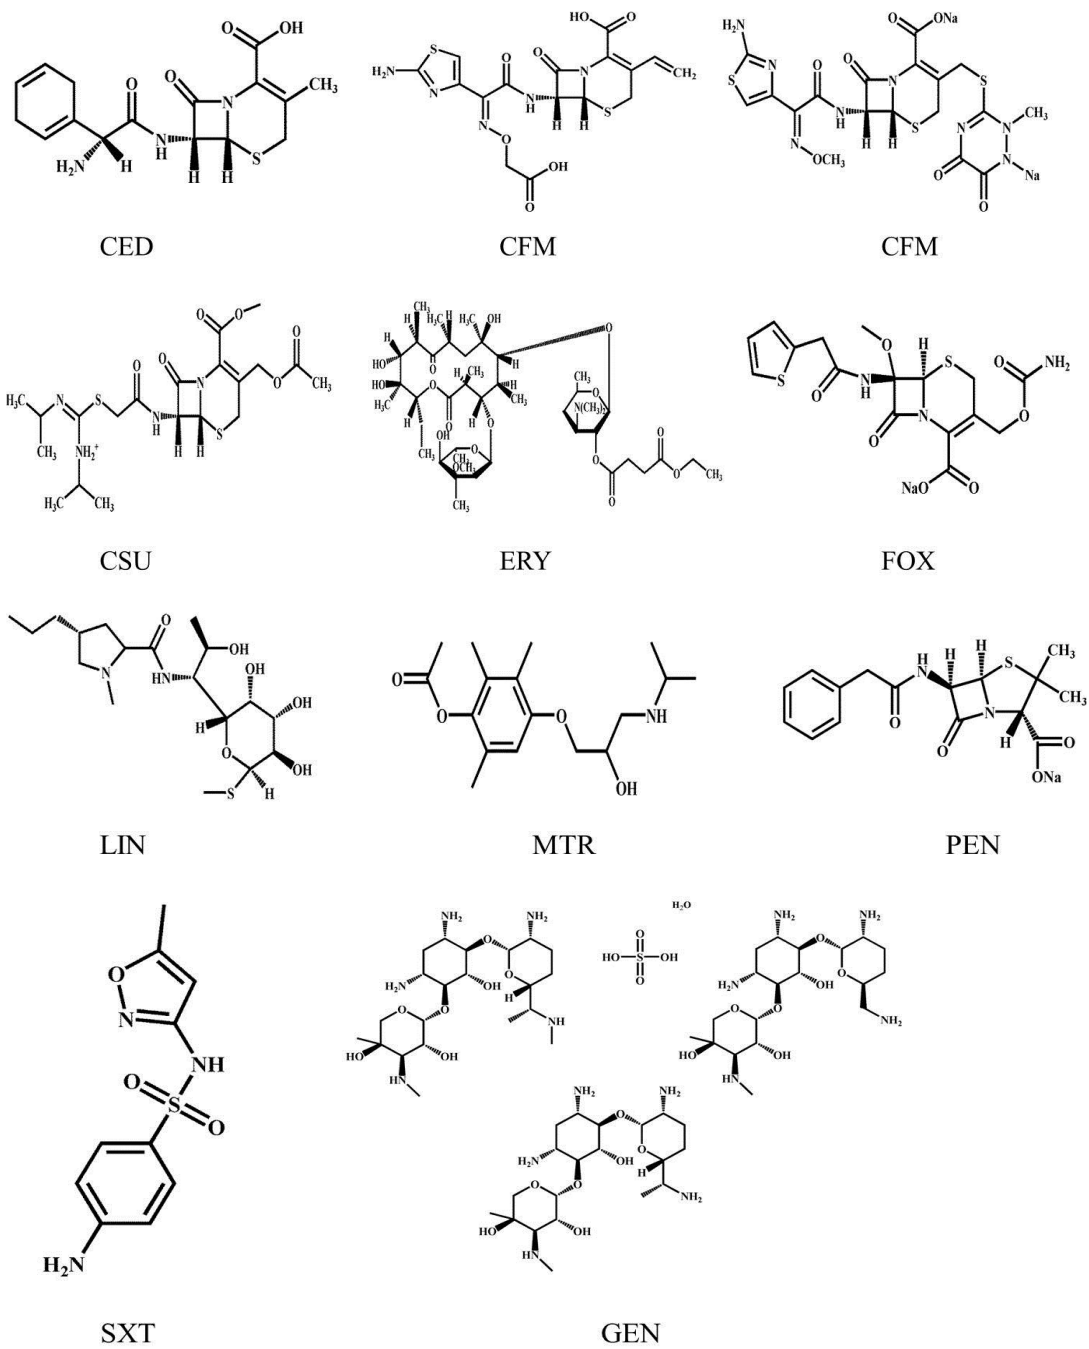

**Fig. S5:** The structural figure of antibiotics

## Section 7. UV-vis and FL spectra of ligands

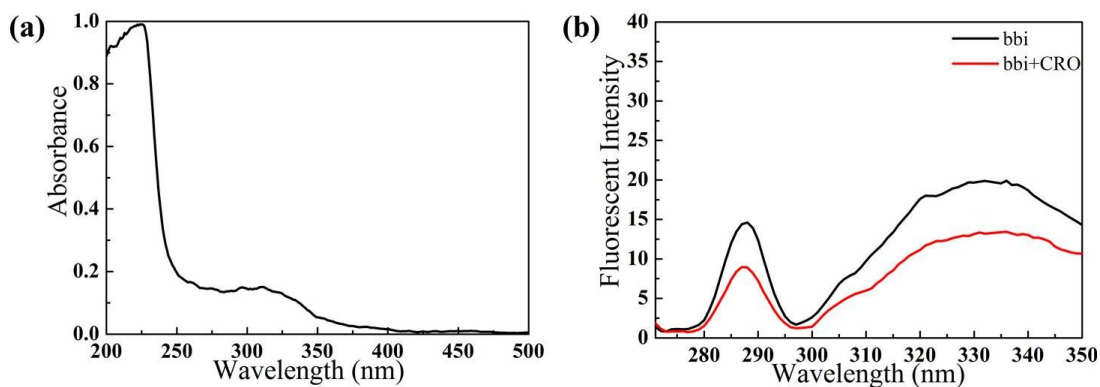

**Fig. S6:** (a) UV-vis absorbance spectra of bbi; (b) The fluorescent spectra of a queous solution of bbi and CRO(14  $\mu$ M) added to aqueous solution of bbi.

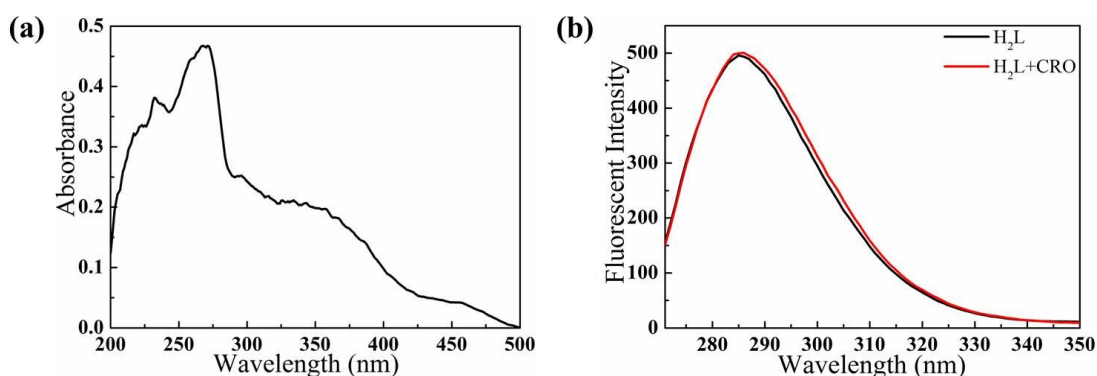

**Fig. S7:** (a) UV-vis absorbance spectra of H<sub>2</sub>L; (b) The fluorescent spectra of aqueous solution of H<sub>2</sub>L and CRO (14  $\mu$ M) added to aqueous solution of H<sub>2</sub>L.

## Section 8. The recyclability tests

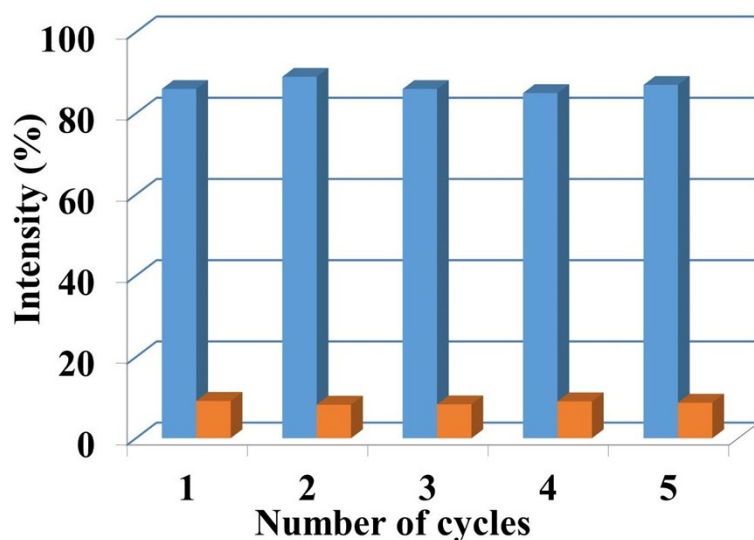

**Fig. S8:** The recyclability tests of Cd-MOFs in CRO(14  $\mu$ M) solution. The blue columns represent the initial relative luminescent intensity and the yellow columns represent the relative intensity on addition of CRO.

## Section 9. Detection of selected antibiotics

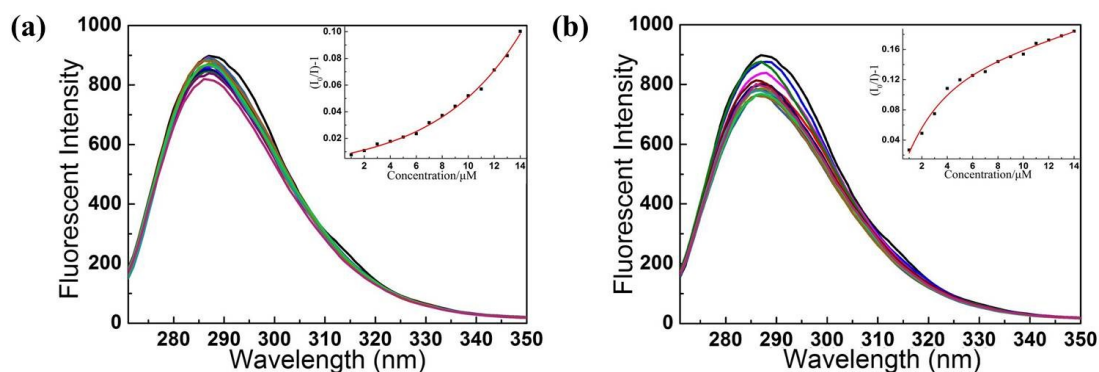

**Fig. S9:** The fluorescent spectra of Cd-MOF dispersed in water upon incremental addition of 70  $\mu\text{L}$  (1 mM, 5  $\mu\text{L}$  addition each time) aqueous solution of (a) SXT (b) ATM, respectively (the corresponding calibration curve of Stern-Volmer plot).

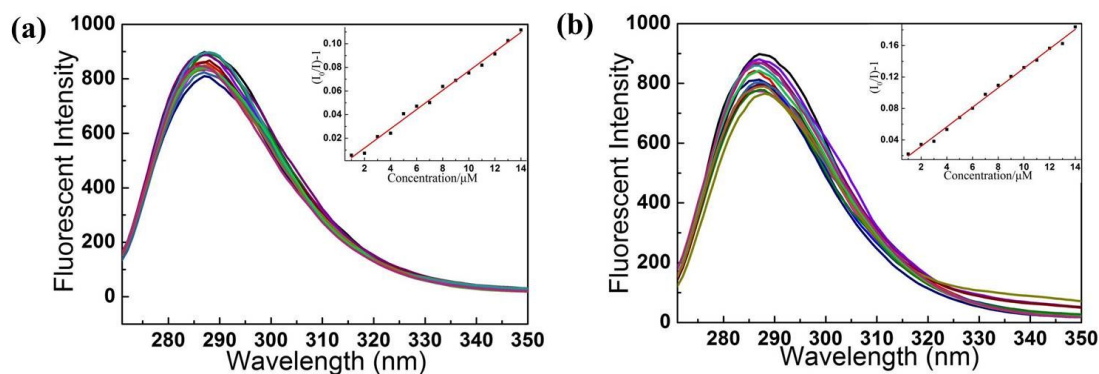

**Fig. S10:** The fluorescent spectra of Cd-MOF dispersed in water upon incremental addition of 70  $\mu\text{L}$  (1 mM, 5  $\mu\text{L}$  addition each time) aqueous solution of (a) AMX (b) CFM, respectively (the corresponding calibration curve of Stern-Volmer plot).

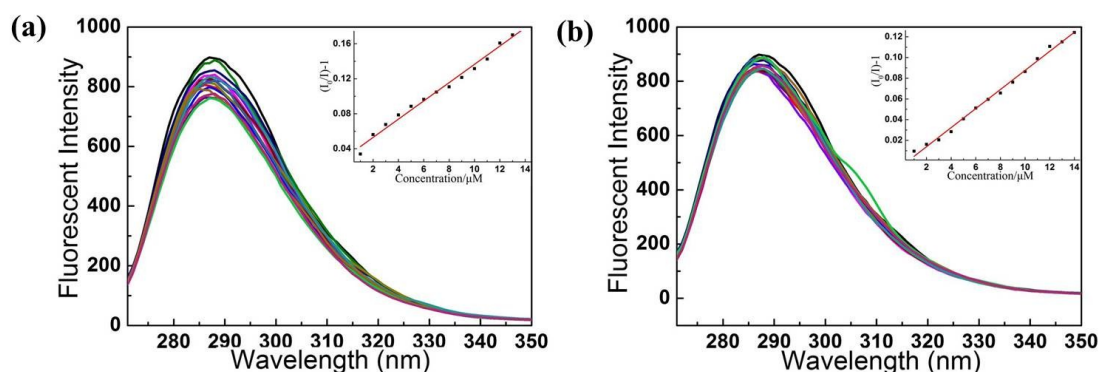

**Fig. S11:** The fluorescent spectra of Cd-MOF dispersed in water upon incremental addition of 70  $\mu\text{L}$  (1 mM, 5  $\mu\text{L}$  addition each time) aqueous solution of (a) CED (b) AZM, respectively (the corresponding calibration curve of Stern-Volmer plot).



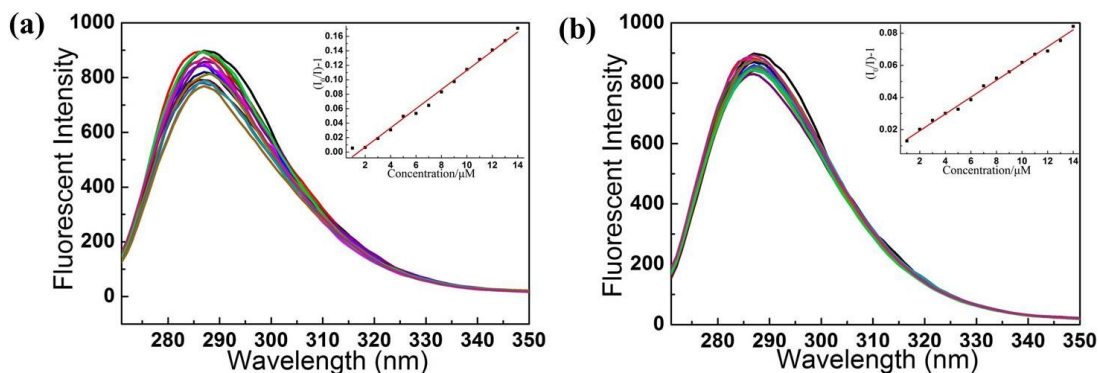

**Fig. S12:** The fluorescent spectra of Cd-MOF dispersed in water upon incremental addition of 70  $\mu\text{L}$  (1 mM, 5  $\mu\text{L}$  addition each time) aqueous solution of (a) CEC (b) PEN, respectively (the corresponding calibration curve of Stern-Volmer plot).

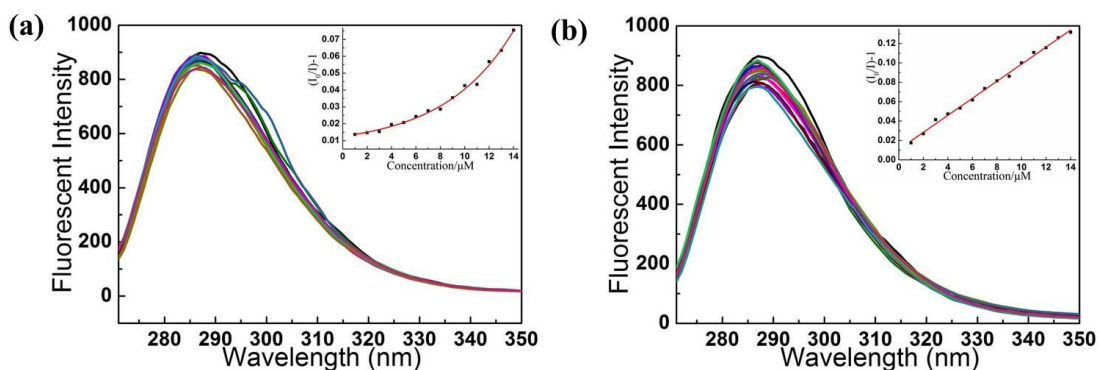

**Fig. S13:** The fluorescent spectra of Cd-MOF dispersed in water upon incremental addition of 70  $\mu\text{L}$  (1 mM, 5  $\mu\text{L}$  addition each time) aqueous solution of (a) AZL (b) FOX, respectively (the corresponding calibration curve of Stern-Volmer plot).

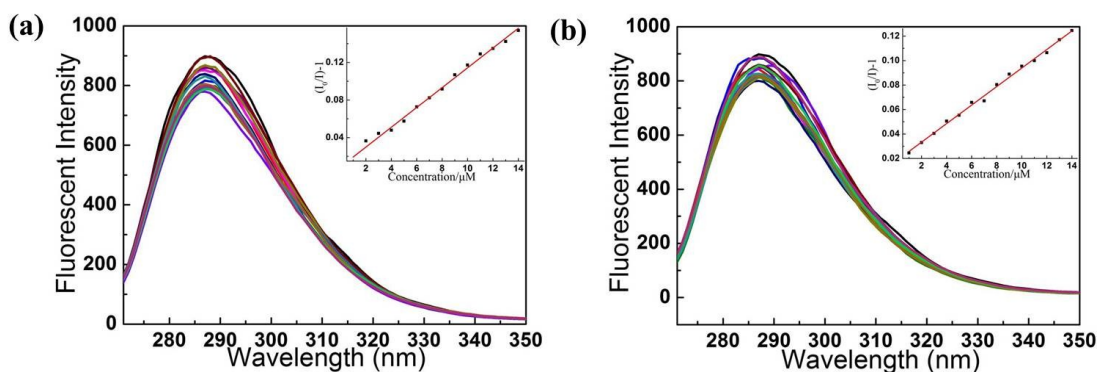

**Fig. S14:** The fluorescent spectra of Cd-MOF dispersed in water upon incremental addition of 70  $\mu\text{L}$  (1 mM, 5  $\mu\text{L}$  addition each time) aqueous solution of (a) CSU (b) ATM, respectively (the corresponding calibration curve of Stern-Volmer plot).



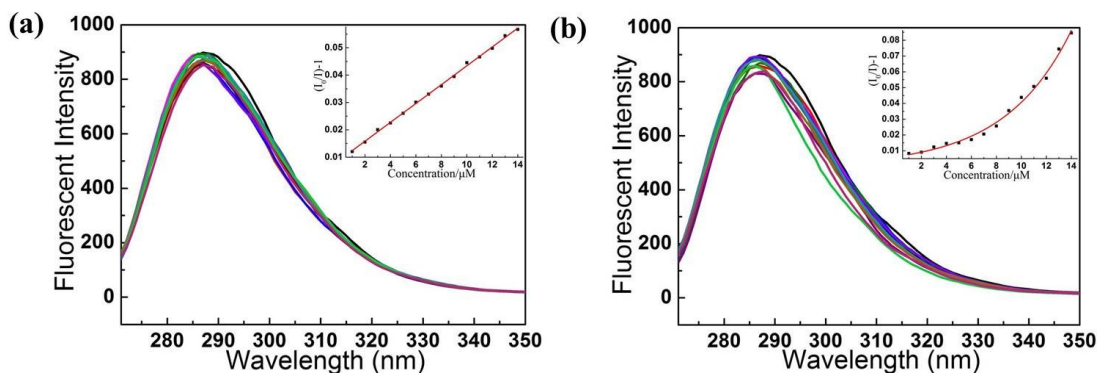

**Fig. S15:**The fluorescent spectra of Cd-MOF dispersed in water upon incremental addition of 70  $\mu\text{L}$  (1 mM, 5  $\mu\text{L}$  addition each time) aqueous solution of (a) LIN (b) AMK, respectively (the corresponding calibration curve of Stern-Volmer plot).

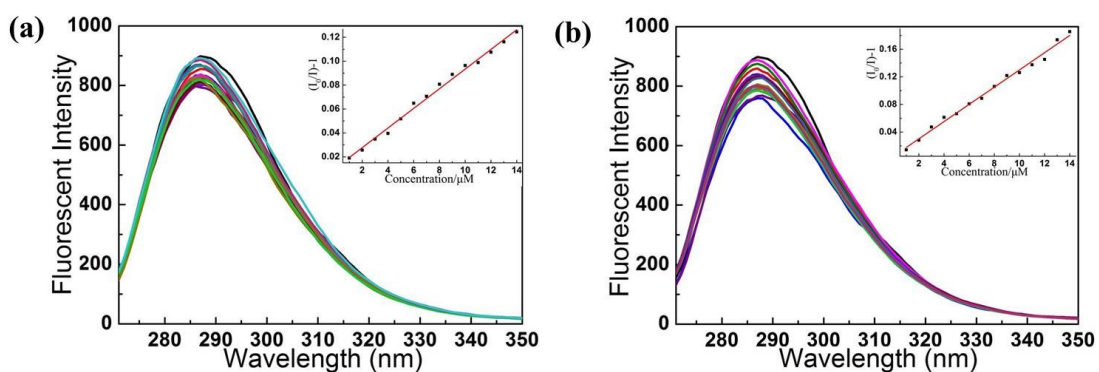

**Figure S16.** The fluorescent spectra of Cd-MOF dispersed in water upon incremental addition of 70  $\mu\text{L}$  (1 mM, 5  $\mu\text{L}$  addition each time) aqueous solution of (a) GEN (b) SXT, respectively (the corresponding calibration curve of Stern-Volmer plot).

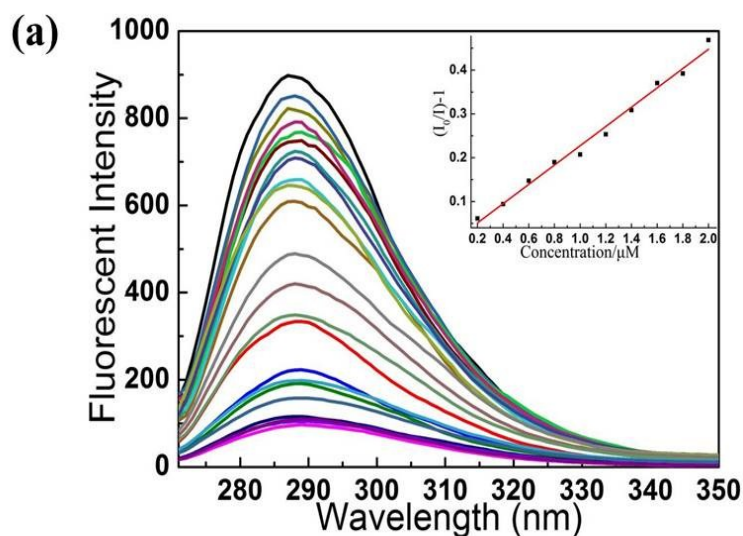

**Figure S17.** The fluorescent spectra of Cd-MOF dispersed in water upon incremental addition of 70  $\mu\text{L}$  (1  $\mu\text{L}$  each time to 10  $\mu\text{L}$ , then 5  $\mu\text{L}$  each time to 70  $\mu\text{L}$ ) aqueous solution of (a) CRO (the corresponding calibration curve of Stern-Volmer plot).

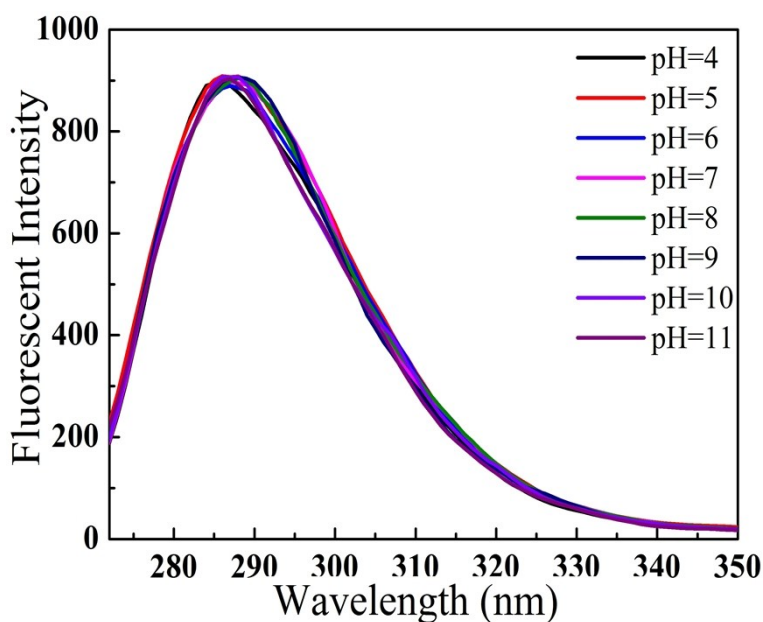

**Figure S18.** In pH=4~11 aqueous solutions, fluorescence intensity of Cd-MOF probe;

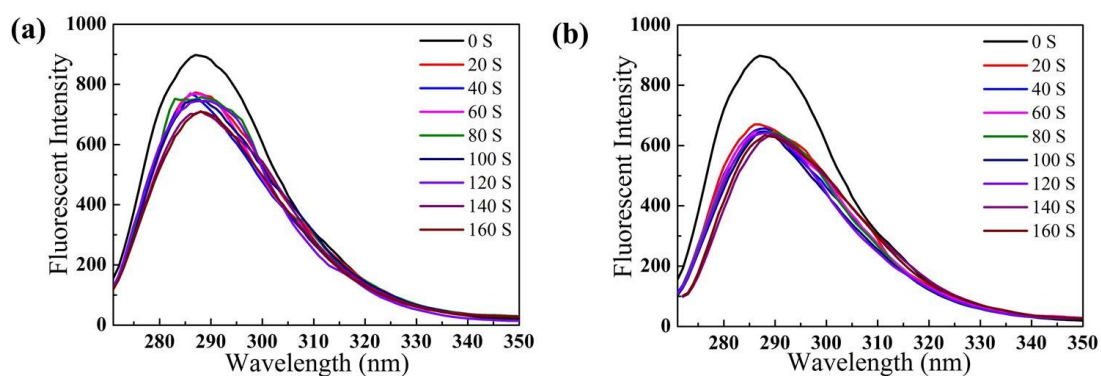

**Fig. S19:** CRO (a.1  $\mu\text{M}$ , b, 1.6  $\mu\text{M}$ ) added to Cd-MOF suspensions, fluorescence intensity time curve.

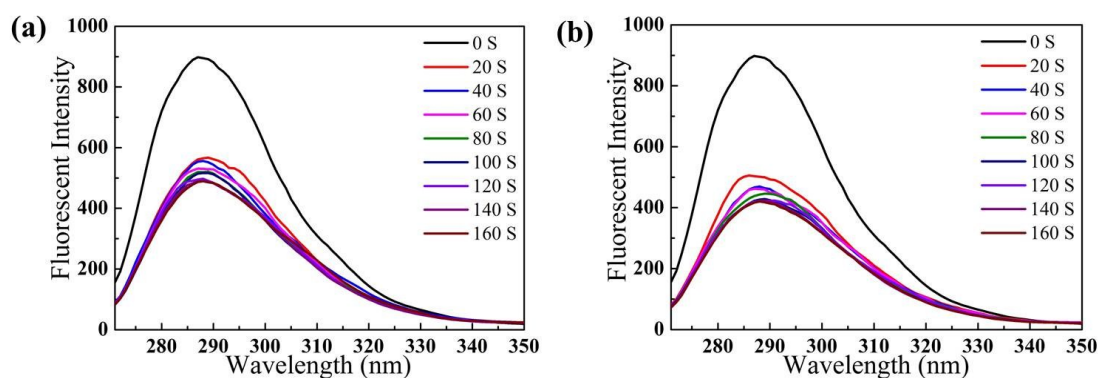

**Fig. S20:** CRO (a.2  $\mu\text{M}$ , b, 3  $\mu\text{M}$ ) added to Cd-MOF suspensions, fluorescence intensity time curve.

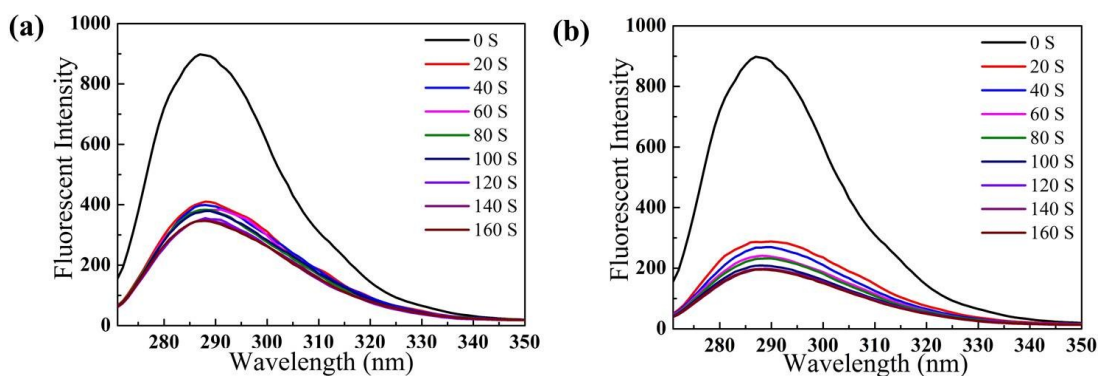

**Fig. S21:** CRO (a.4  $\mu\text{M}$ , b, 6  $\mu\text{M}$ ) added to Cd-MOF suspensions, fluorescence intensity time curve.

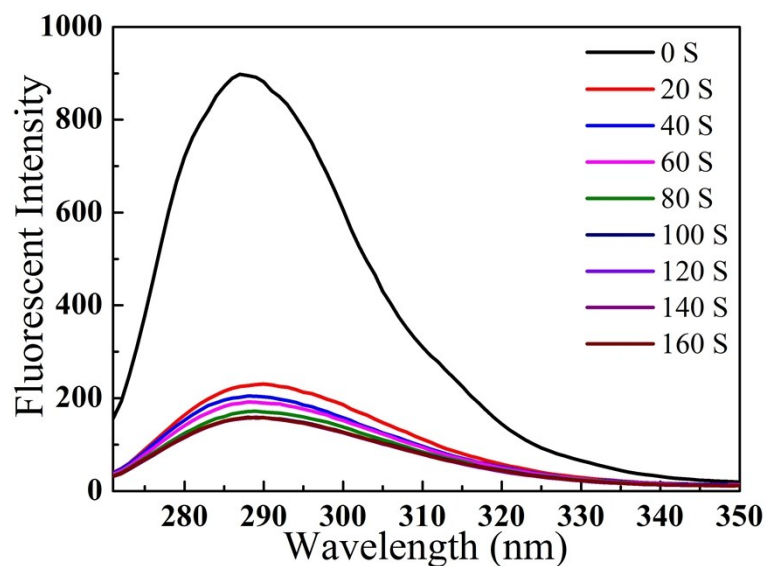

**Fig. S22:** CRO(8  $\mu\text{M}$ ) added to Cd-MOF suspensions, fluorescence intensity time curve.

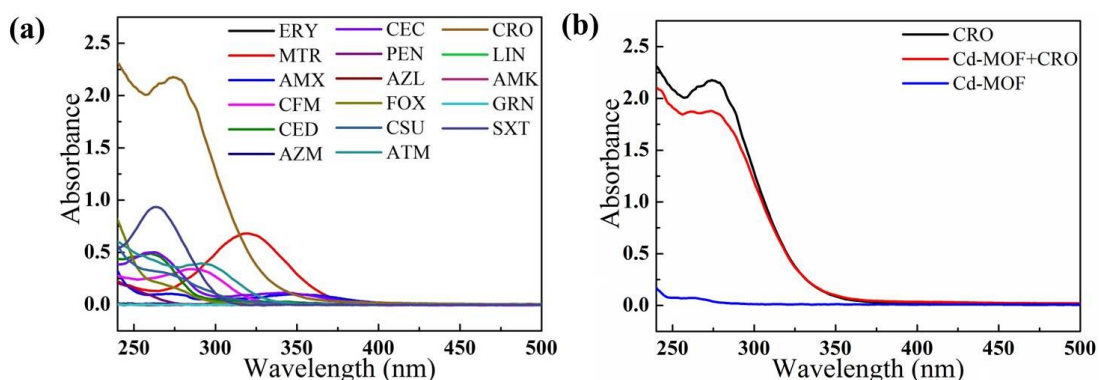

**Fig. S23:** (a) UV-visible spectra of antibiotics in water; (b) UV-visible spectra of CRO, Cd-MOF, mixtures of CRO and Cd-MOF in water.

#### 4. References

- 1 B. Wang, X.L. Lv, D.W. Feng, L.H. Xie, J. Zhang, M. Li, Y.B. Xie, J.R. Li, H.C. Zhou, Highly Stable Zr(IV)-Based Metal-Organic Frameworks for the Detection and Removal of Antibiotics and Organic Explosives in Water, *J Am Chem Soc*, 2016, 138(19), 6204-6216.
- 2 D. Zhao, X.H. Liu, Y. Zhao, P. Wang, Y. Liu, M. Azam, S.I. Al-Resayes, Y. Lu, W.Y. Sun, Luminescent Cd(II)-organic frameworks with chelating NH<sub>2</sub> sites for selective detection of Fe(III) and antibiotics, *J Am Chem Soc*, 2017, 139(30) 15797-15807.
- 3 S.L. Hou, J. Dong, X.L. Jiang, Z.H. Jiao, C.M. Wang, B. Zhao, Interpenetration-Dependent Luminescent Probe in Indium-Organic Frameworks for Selectively Detecting Nitrofurazone in Water, *Anal Chem*, 2018, 90(3)1516-1519.
- 4 Z.W. Zhai, S.H. Yang, M. Cao, L.K. Li, C.X. Du, S.Q. Zang, Rational Design of Three Two-Fold Interpenetrated Metal-Organic Frameworks: Luminescent Zn/Cd-Metal-Organic Frameworks for Detection of 2,4,6-Trinitrophenol and Nitrofurazone in the Aqueous Phase, *Crystal Growth & Design*, 2018, 18(11) 7173-7182.
